# Supplementary figures and images for: MAP3K1/MAP2K4 Mutations Drive Breast Cancer Progression by Compensating TP53 Loss via JNK2-p53-FOSL1 Axis Inactivation
Source: Research Square preprint supplement (doi:10.21203/rs.3.rs-7033784/v1), 2025-08-11

**Full uncropped Blots images**


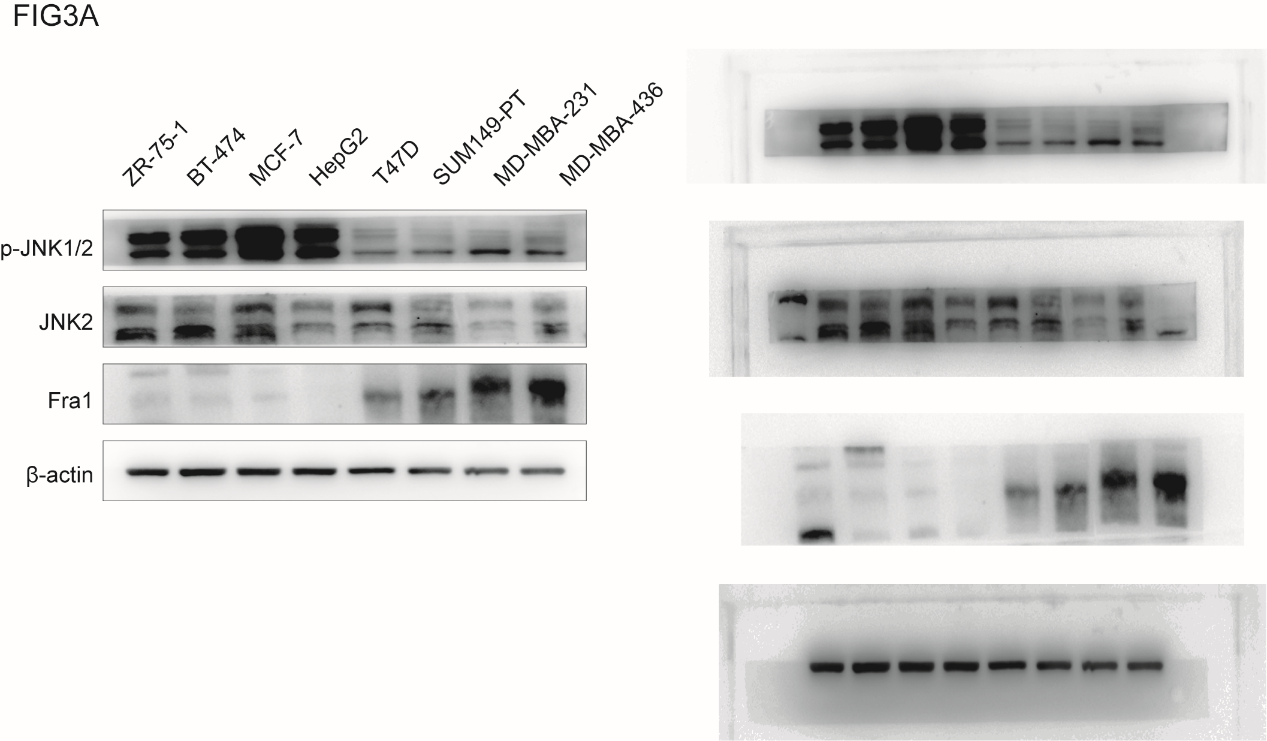


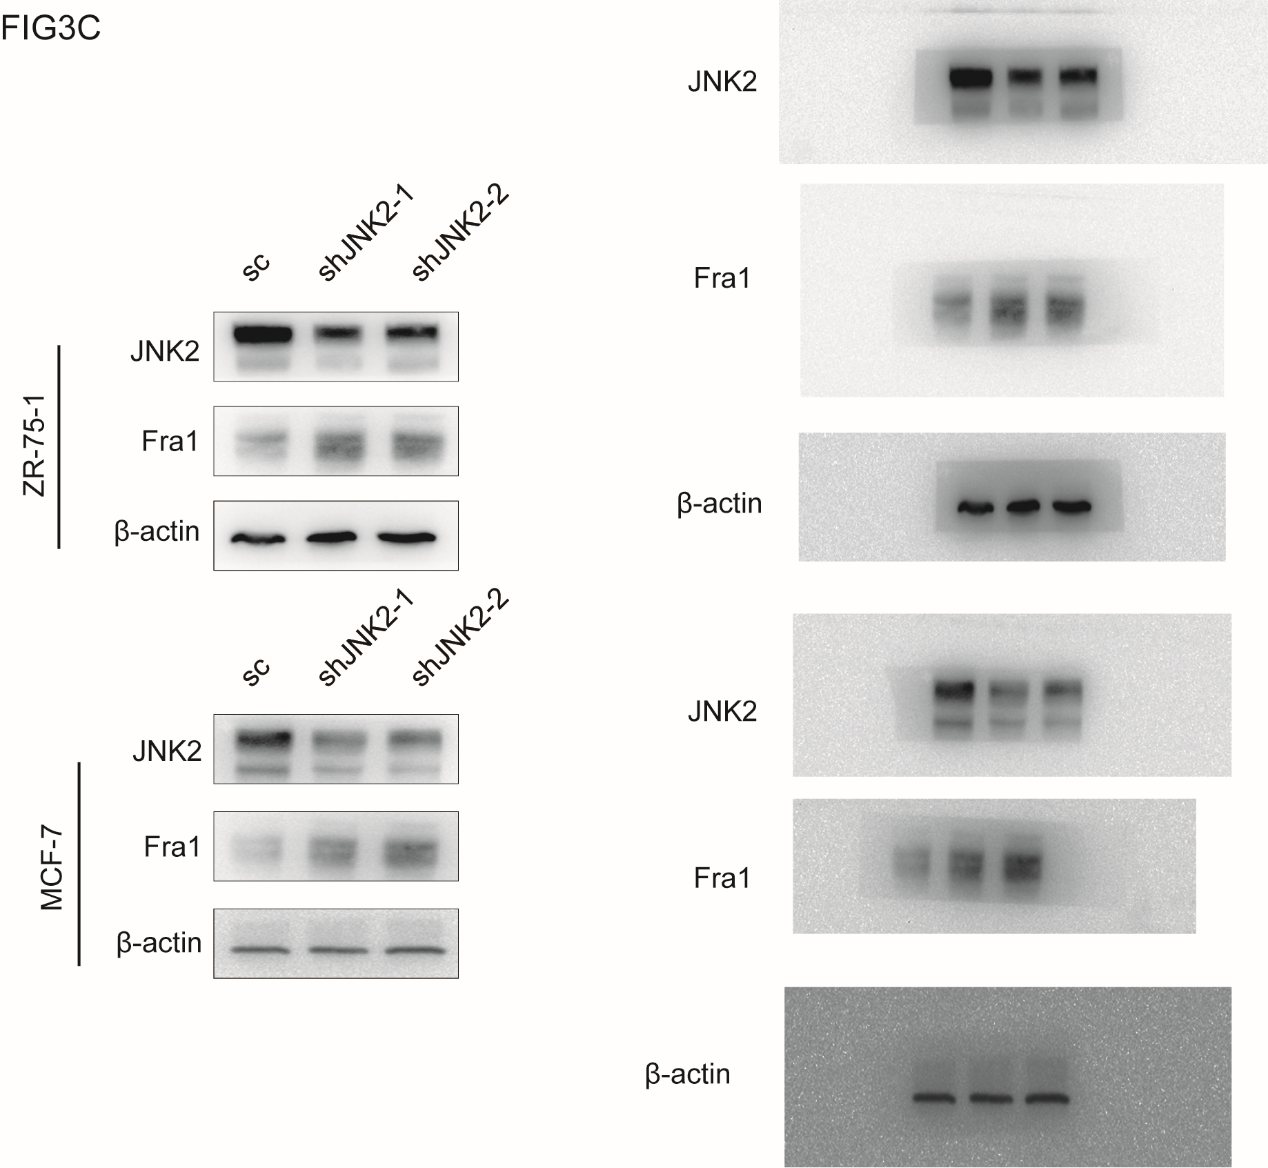


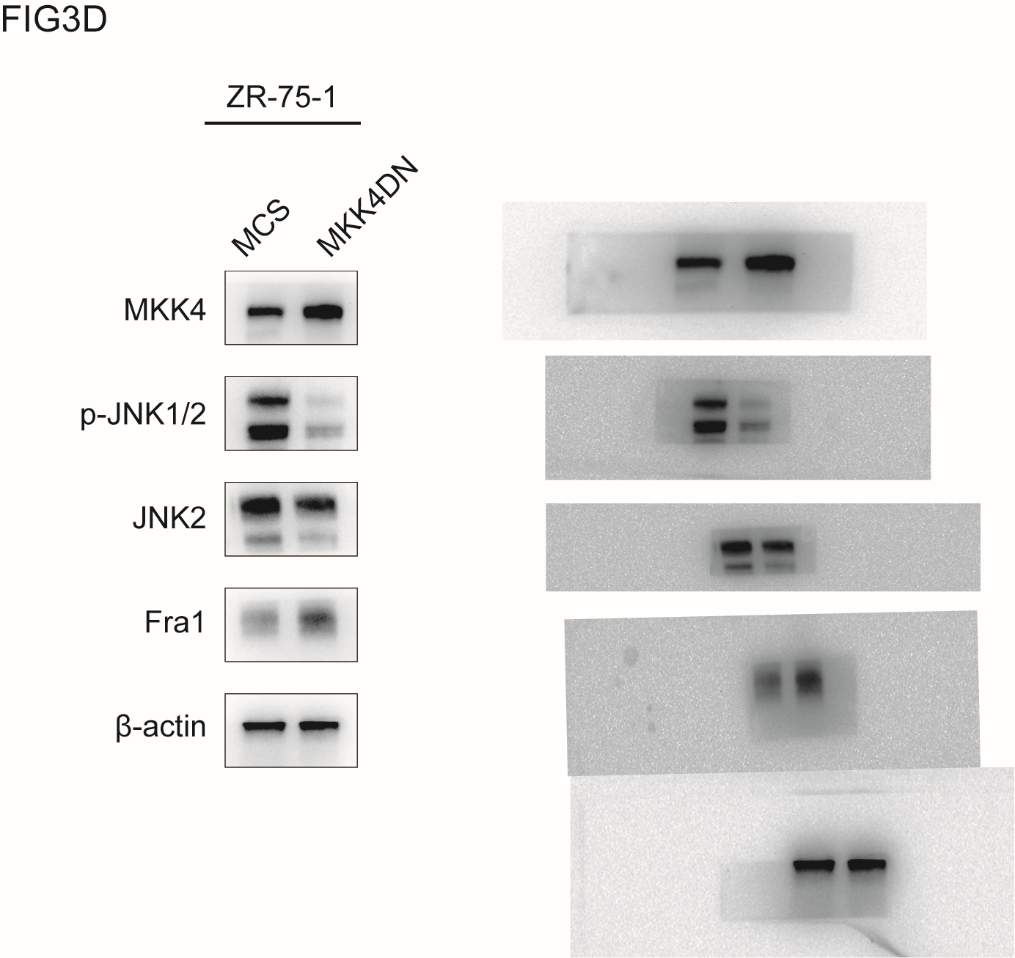


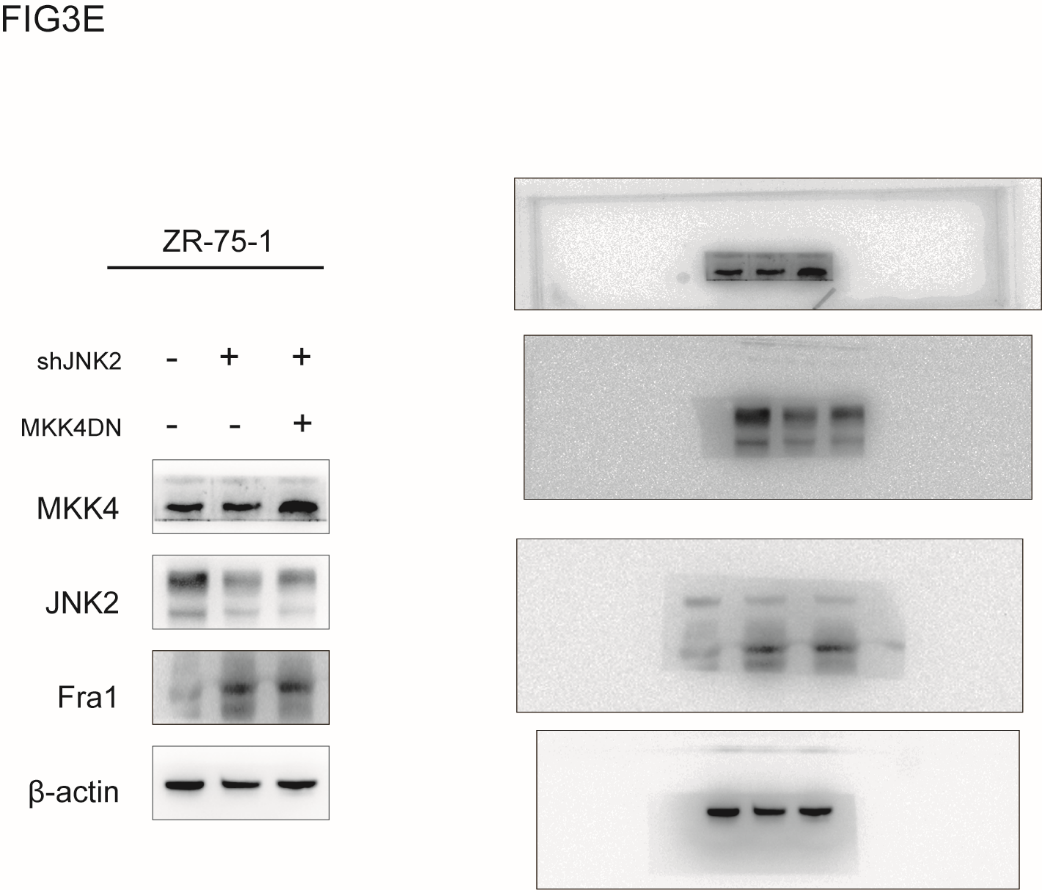

Supplement: Supplementary file 1 [file 8fdf0cf15fde0ac36995fd2c.docx]
